# Supplementary material for: Electronic communication between metal–organic electrophores in an organometallic ruthenium–acetylide–tetrathiafulvalene complex
Source: Royal Society of Chemistry journal article supplement (doi:10.1039/b915158c), 2009-01-01
Supplement: b915158c.pdf [file b915158c.pdf]

## Supporting Information

# Electronic communication between metal-organic electrophores in an organometallic ruthenium-acetylide-tetrathiafulvalene complex.

Antoine Vacher, Frédéric Barrière, Thierry Roisnel and Dominique Lorcy\*

*Sciences Chimiques de Rennes, UMR 6226 CNRS-Université de Rennes 1, Matière Condensée et Systèmes Electroactifs (MaCSE), Campus de Beaulieu, Bât 10A, 35042 Rennes cedex, France. E-mail : [dominique.lorcy@univ-rennes1.fr](mailto:dominique.lorcy@univ-rennes1.fr)*

**General procedures :** All reagents are commercially available and were used without further purification. Melting points were measured on a Kofler hot-stage apparatus and are uncorrected. Infrared spectra were recorded on a Varian 640 FT-IR spectrometer.  $^1\text{H}$  NMR,  $^{13}\text{C}$  NMR and  $^{31}\text{P}$  NMR spectra were recorded on Bruker ARX 200 and AC 300P spectrometers. Chemical shifts are quoted in parts per million (ppm) referenced to tetramethylsilane for  $^1\text{H}$  NMR,  $^{13}\text{C}$  NMR spectra and to  $\text{H}_3\text{PO}_4$  for  $^{31}\text{P}$  NMR spectra. Mass spectra were recorded with Varian MAT 311 instrument by the Centre Régional de Mesures Physiques de l'Ouest, Rennes. Elemental analysis were performed at the Centre Régional de Mesures Physiques de l'Ouest, Rennes. All the reactions were performed under an argon atmosphere with the use of Schlenk techniques. Tetrahydrofuran and diethyl ether were distilled from sodium-benzophenone. Column chromatography was performed using silica gel Merck 60 (70-260 mesh). Cyclic voltammetry were carried out on a  $10^{-3}$  M solution of TTF derivatives in  $\text{CH}_2\text{Cl}_2$ , containing 0.1 M  $\text{nBu}_4\text{NPF}_6$  as supporting electrolyte. Voltammograms were recorded at  $0.1 \text{ Vs}^{-1}$  on a platinum disk electrode ( $A = 1\text{mm}^2$ ). The

potentials were measured *versus* Saturated Calomel Electrode. The spectroelectrochemical setup was realized versus SCE in 0.2 M nBu<sub>4</sub>NPF<sub>6</sub>/CH<sub>2</sub>Cl<sub>2</sub>. A Cary 5 spectrophotometer was employed to record the UV-visible-NIR spectra. The EPR measurements were performed on Bruker ESP-300E X-band spectrometer. The EPR study was carried out on a CH<sub>2</sub>Cl<sub>2</sub> solution of **5** with one equivalent of the oxidizing agent NOPF<sub>6</sub>. The EPR spectrum of [**5**][PF<sub>6</sub>] is shown in Figure S3.

**Synthesis of trimethylsilylethynyltrimethyl TTF 2 :** The iodo TTF **1** (200 mg, 0.54 mmol), Pd(PPh<sub>3</sub>)<sub>2</sub>Cl<sub>2</sub> (110 mg, 0.16 mmol), CuI (50 mg, 0.26 mmol), the trimethylsilylacetylene (0.43 mmol), diisopropylamine (0.185 mL, 1.3 mmol) were added to THF (20 mL). The reaction mixture was stirred at room temperature for 48 h. The solvent was removed in vacuo and the crude product was chromatographed on a silica gel column using CH<sub>2</sub>Cl<sub>2</sub>/petroleum ether (50/50) as eluent. The TTF **2** was obtained as orange crystals in 75 % yield. mp 142°C; <sup>1</sup>H NMR(CDCl<sub>3</sub>) : δ 0.25 (s, 9H, SiMe<sub>3</sub>), 1.98 (s, 6H, Me), 2.16 (s, 3H, Me); <sup>13</sup>C NMR (CDCl<sub>3</sub>) δ 139.29 (C), 123.12 (C), 122.72 (C), 111.26 (C), 110.25 (C), 101.88 (C), 95.21 (C), 83.84 (C), 15.97 (CH<sub>3</sub>), 13.90 (CH<sub>3</sub>), 13.88 (CH<sub>3</sub>), 0.00 (SiMe<sub>3</sub>); IR (KBr): 2140 cm<sup>-1</sup> (ν<sub>C≡C</sub>). Anal Calcd for C<sub>14</sub>H<sub>18</sub>S<sub>4</sub>Si C, 49.08; H, 5.30; S, 37.43. Found: C, 49.35; H, 5.27; S, 37.91.

**Synthesis of ethynyltrimethyl TTF 3 :** To a solution **2** (113 mg, 0.32 mmol) in 20 mL of MeOH was added KF (40 mg, 0.66 mmol). The solution was stirred for 15h at room temperature and the solvent was removed under vacuum. The product was purified by column chromatography using CH<sub>2</sub>Cl<sub>2</sub>/petroleum ether (50/50) as eluent. TTF **3** was obtained as red powder in quantitative yield. mp 140°C; <sup>1</sup>H NMR(CDCl<sub>3</sub>) δ 1.98 (s, 3H, H<sub>1</sub>), 2.18 (s, 6H, H<sub>2</sub>), 3.37 (s, 1H, H<sub>3</sub>); <sup>13</sup>C NMR (CDCl<sub>3</sub>) : δ 138.94 (C), 121.93 (C), 121.58 (C), 110.55 (C), 107.83 (C), 104.43 (C), 82.65 (C), 73.76 (≡C-H), 14.68 (CH<sub>3</sub>), 12.71 (CH<sub>3</sub>), 12.69 (CH<sub>3</sub>); IR (KBr): 2140 cm<sup>-1</sup> (ν<sub>C≡C</sub>); Anal Calcd for C<sub>11</sub>H<sub>10</sub>S<sub>4</sub> C, 48.85; H, 3.73. Found: C, 49.05; H, 3.47.

**Synthesis of the Ruthenium-acetylide-tetrathiafulvalene complex 5:** A solution of **3** (190 mg, 0.7 mmol) in 15 mL of CH<sub>2</sub>Cl<sub>2</sub> was added to a solution of [ClRu(dppe)<sub>2</sub>][OTf] (573 mg, 0.53 mmol) in 15 mL of CH<sub>2</sub>Cl<sub>2</sub>. After 24 h of stirring at room temperature, the solvent was removed in vacuo and the precipitate was washed with diethyl ether. Dissolution of the precipitate in the minimum of CH<sub>2</sub>Cl<sub>2</sub> followed by the addition of pentane allowed the purification of the complex [4][TfO] which was obtained in 40 % yield as a dark green precipitate. Crystals were obtained by slow diffusion of pentane into a concentrated solution of [4][TfO] in CH<sub>2</sub>Cl<sub>2</sub>. This vinylidene derivative [4][TfO] is not stable and was used without other purification in the formation of the complex **5**. <sup>31</sup>P NMR (121 MHz, CDCl<sub>3</sub>) δ 43.5 (t, <sup>3</sup>J<sub>PP</sub> = 21 Hz), 41.9 (t, <sup>3</sup>J<sub>PP</sub> = 21 Hz). This vinylidene derivative [4][TfO] was dissolved in 25 mL of CH<sub>2</sub>Cl<sub>2</sub> and an excess of NEt<sub>3</sub> was added. The reaction mixture was stirred at room temperature for 1 h and then distilled water was added to the medium (2x 20 mL). The light orange organic phase was dried over Na<sub>2</sub>SO<sub>4</sub> and the solvent was removed in vacuo. The precipitate was washed with pentane and dissolved in minimum amount of CH<sub>2</sub>Cl<sub>2</sub> and precipitated again by the addition of pentane. Complex **5** was obtained as a light brown powder in 70 % yield. <sup>31</sup>P NMR(CDCl<sub>3</sub>) δ 49.18 (s, 4P); <sup>1</sup>H NMR (CDCl<sub>3</sub>) δ 7.72-6.72 (m, 40H, phényl), 2.78 (m, 4H, dppe), 2.58 (m, 4H, dppe), 2.00(s, 3H, Me), 1.97(s, 3H, Me); 1.06 (s, 3H, Me); <sup>13</sup>C NMR (CD<sub>2</sub>Cl<sub>2</sub>) δ 136.59-136.04 (C<sub>ipso</sub> Ph dppe), 135.43-134.90 (C<sub>ipso</sub> Ph dppe), 134.67-134.60 (CH Ph dppe), 134.06-134.00 (CH Ph dppe), 129.44 (CH Ph dppe), 128.54 (CH Ph dppe), 127.46-127.41 (CH Ph dppe), 126.83-126.77 (CH Ph dppe), 122.86 (TTF), 122.50 (TTF), 115.39 (Cβ), 109.75 (TTF), 105.35 (TTF), 105.22 (TTF), 30.79 (CH<sub>2</sub> dppe, |<sup>1</sup>J<sub>PC</sub>+<sup>3</sup>J<sub>PC</sub>| = 23.3 Hz), 22.33 (TTF), 14.05 (MeTTF), 13.84 (MeTTF), 13.79 (MeTTF); IR (KBr) 2029 cm<sup>-1</sup> (s, ν<sub>C=C</sub>); HRMS (EI): *m/z* calcd for C<sub>63</sub>H<sub>57</sub>P<sub>4</sub>S<sub>4</sub>ClRu: 1202.1026 found: 1202.1028.

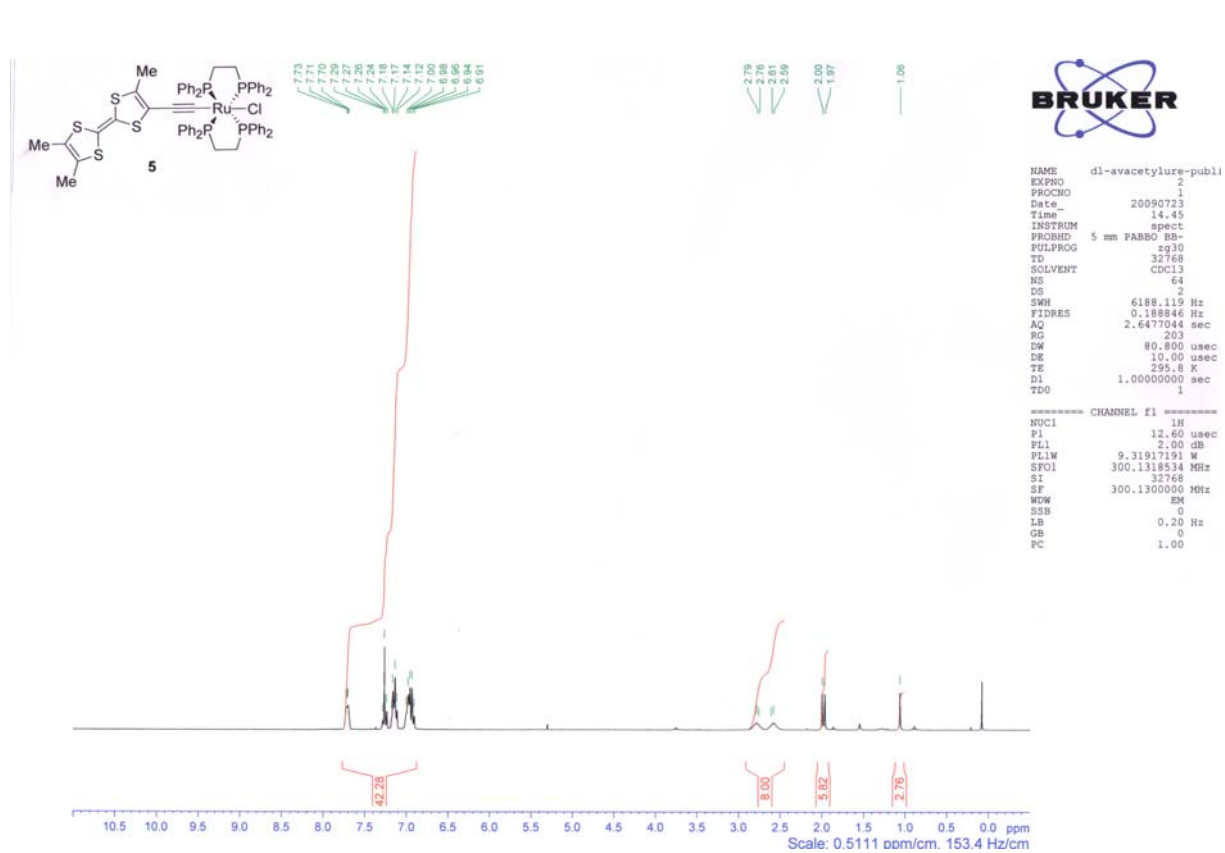

**Fig S1**  $^1\text{H}$  NMR spectrum of **5** in  $\text{CDCl}_3$

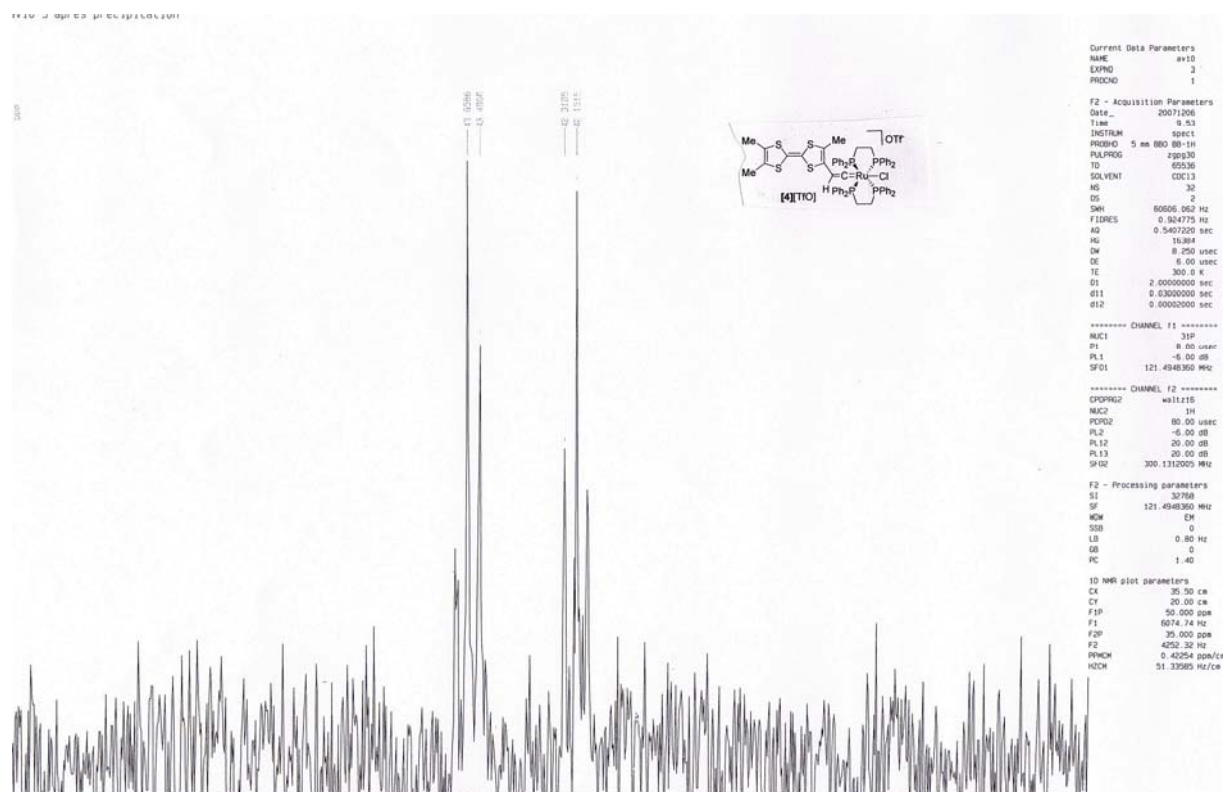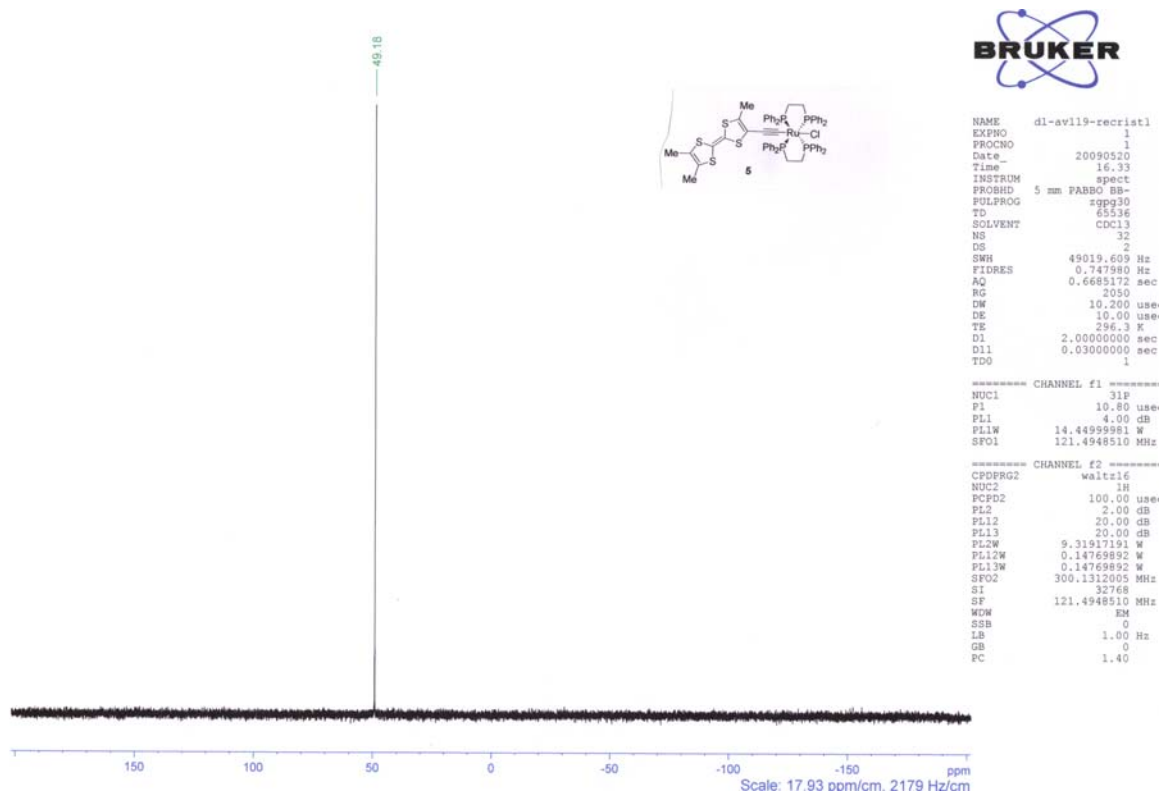

**Fig S2.**  $^{31}\text{P}$  NMR spectra of vinylidene complex [4][TfO] (top) and complex 5 (bottom)

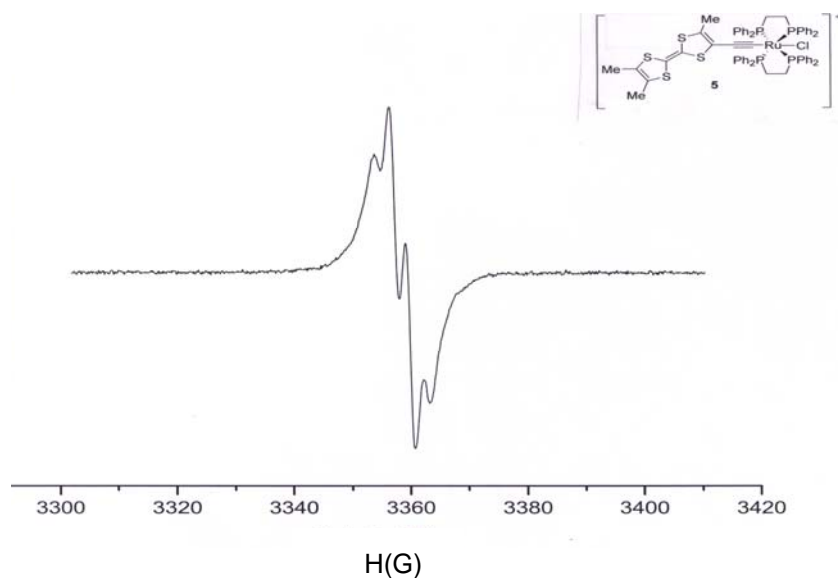

**Fig S3.** EPR spectrum of  $5^+$  recorded at room temperature (hyperfine coupling  $a_H = 2.7$  G,  $g = 2.015$ )

**Crystallography.** Crystals were picked up with a cryo-loop and then frozen at  $T=100$ K under a stream of dry  $N_2$  on a APEX II Bruker AXS diffractometer for X-ray data collection (Mo- $K\alpha$  radiation,  $\lambda = 0.71073$  Å). The structure was solved by direct methods using the SIR97 program [1], and then refined with full-matrix least-square methods based on  $F^2$  (SHELX-97) [2] with the aid of the WINGX [3] program. The contribution of the disordered solvents to the calculated structure factors was estimated following the BYPASS algorithm [4], implemented as the SQUEEZE option in PLATON [5]. A new data set, free of solvent contribution, was then used in the final refinement. All non-hydrogen atoms were refined with anisotropic thermal parameters. H atoms were finally included in their calculated positions. (C63 H58 Cl P4 Ru S4, C F3 O3 S, 2(C H2 Cl2));  $M = 1522.66$ . APEXII, Bruker-AXS diffractometer, Mo- $K\alpha$  radiation ( $\lambda = 0.71073$  Å),  $T = 100(2)$  K; monoclinic  $C 2/c$ ,  $a = 19.7287(11)$ ,  $b = 19.2039(9)$ ,  $c = 36.6357(19)$  Å,  $\beta = 101.699(2)^\circ$ ,  $V = 13591.8(12)$  Å<sup>3</sup>,  $Z = 8$ ,  $d = 1.488$  g.cm<sup>-3</sup>,  $\mu = 0.729$

$\text{mm}^{-1}$  A final refinement on  $F^2$  with 15532 unique intensities and 832 parameters converged at  $\omega R(F^2) = 0.1211$  ( $R(F) = 0.0609$ ) for 14621 observed reflections with  $I > 2\sigma(I)$ .

- [1] A. Altomare, M. C. Burla, M. Camalli, G. Cascarano, C. Giacovazzo, A. Guagliardi, A. G. G. Moliterni, G. Polidori, R. Spagna, *J. Appl. Cryst.* 1999, 32, 115-119.
- [2] SHELX97 - Programs for Crystal Structure Analysis (Release 97-2). G. M. Sheldrick, Institut für Anorganische Chemie der Universität, Tammanstrasse 4, D-3400 Göttingen, Germany, 1998
- [3] L. J. Farrugia, *J. Appl. Cryst.*, 1999, 32, 837-838
- [4] Sluis, P. v.d. & Spek, A. L. (1990) *Acta Cryst.* A46, 194-201
- [5] A. L. Spek, *Acta Crystallogr., Sect A* 1990, 46, C34

## Computational Details.

Full geometry optimization of models of **5** and **5<sup>+</sup>** with Density Functional Theory<sup>1</sup> calculations were performed with the hybrid Becke-3 parameter exchange functional<sup>2</sup> and the Lee-Yang-Parr nonlocal correlation functional<sup>3</sup> (B3LYP) implemented in the *Gaussian 03* (revision D.02) program suite<sup>4</sup> using the LANL2DZ basis set<sup>5</sup> and a quadratically convergent self-consistent field procedure<sup>6</sup> with the default convergence criteria implemented in the program. The figures were generated with Molekel 4.3.<sup>7</sup>

[1] (a) P. Hohenberg, W. Kohn, *Phys. Rev.* **1964**, *136*, B864. (b) R. G. Parr, W. Yang, *Density-Functional Theory of Atoms and Molecules*; Oxford University Press: Oxford, U.K., 1989.

[2] (a) A. D. Becke, *Phys. Rev. A* **1988**, *38*, 3098. (b) A. D. Becke, *J. Chem. Phys.* **1993**, *98*, 1372. (c) A. D. Becke, *J. Chem. Phys.* **1993**, *98*, 5648.

[3] C. Lee, W. Yang, R. G. Parr, *Phys. Rev. B* **1988**, *37*, 785.

[4] Gaussian 03, Revision D.02, M. J. Frisch, G. W. Trucks, H. B. Schlegel, G. E. Scuseria, M. A. Robb, J. R. Cheeseman, J. A. Montgomery, Jr., T. Vreven, K. N. Kudin, J. C. Burant, J. M. Millam, S. S. Iyengar, J. Tomasi, V. Barone, B. Mennucci, M. Cossi, G. Scalmani, N. Rega, G. A. Petersson, H. Nakatsuji, M. Hada, M. Ehara, K. Toyota, R. Fukuda, J. Hasegawa, M. Ishida, T. Nakajima, Y. Honda, O. Kitao, H. Nakai, M. Klene, X. Li, J. E. Knox, H. P. Hratchian, J. B. Cross, V. Bakken, C. Adamo, J. Jaramillo, R. Gomperts, R. E. Stratmann, O. Yazyev, A. J. Austin, R. Cammi, C. Pomelli, J. W. Ochterski, P. Y. Ayala, K. Morokuma, G. A. Voth, P. Salvador, J. J. Dannenberg, V. G. Zakrzewski, S. Dapprich, A. D. Daniels, M. C. Strain, O. Farkas, D. K. Malick, A. D. Rabuck, K. Raghavachari, J. B. Foresman, J. V. Ortiz, Q. Cui, A. G. Baboul, S. Clifford, J. Cioslowski, B. B. Stefanov, G. Liu, A. Liashenko, P. Piskorz, I. Komaromi, R. L. Martin, D. J. Fox, T. Keith, M. A. Al-Laham, C. Y. Peng, A. Nanayakkara, M. Challacombe, P. M. W. Gill, B. Johnson, W. Chen, M. W. Wong, C. Gonzalez, and J. A. Pople, Gaussian, Inc., Wallingford CT, 2004.

[5] (a) Wadt, W. R.; Hay, P. J. *J. Chem. Phys.* **1985**, *82*, 284. (b) P. J. Hay, W. R. Wadt, *J. Chem. Phys.* **1985**, *82*, 299.

[6] G. B. Bacskay, *Chem. Phys.* **1981**, *61*, 385.

[7] MOLEKEL 4.3. P. Flükiger, H. P. Lüthi, S. Portmann, J. Weber, Swiss Center for Scientific Computing, Manno (Switzerland) 2000.



## Cartesian Coordinates of 5 and 5<sup>+</sup>

### Cartesian Coordinates of 5

Neutral species\\\

Stoichiometry C63H57ClP4RuS4  
Framework group C1[X(C63H57ClP4RuS4)]  
Deg. of freedom 384  
Full point group C1  
Largest Abelian subgroup C1 NOp 1  
Largest concise Abelian subgroup C1 NOp 1  
Standard orientation:

| Center<br>Number | Atomic<br>Number | Atomic<br>Type | Coordinates (Angstroms) |           |           |
|------------------|------------------|----------------|-------------------------|-----------|-----------|
|                  |                  |                | X                       | Y         | Z         |
| 1                | 44               | 0              | 1.585136                | 0.006068  | 0.238075  |
| 2                | 17               | 0              | 3.940933                | -0.157093 | 1.373653  |
| 3                | 15               | 0              | 2.098987                | -1.611642 | -1.593170 |
| 4                | 15               | 0              | 2.233111                | 1.675533  | -1.500650 |
| 5                | 6                | 0              | 0.814573                | -2.911955 | -2.086800 |
| 6                | 6                | 0              | -0.334352               | -2.555021 | -2.825534 |
| 7                | 6                | 0              | -1.288276               | -3.527647 | -3.178789 |
| 8                | 6                | 0              | -1.109459               | -4.869496 | -2.793105 |
| 9                | 6                | 0              | 0.031585                | -5.230964 | -2.052020 |
| 10               | 6                | 0              | 0.985987                | -4.259160 | -1.699927 |
| 11               | 6                | 0              | 3.671744                | -2.659718 | -1.702027 |
| 12               | 6                | 0              | 4.471554                | -2.908012 | -0.570363 |
| 13               | 6                | 0              | 5.626944                | -3.708763 | -0.683463 |
| 14               | 6                | 0              | 5.992100                | -4.264027 | -1.922163 |
| 15               | 6                | 0              | 5.192296                | -4.019525 | -3.057530 |
| 16               | 6                | 0              | 4.038222                | -3.226452 | -2.946254 |
| 17               | 6                | 0              | 2.259217                | -0.577204 | -3.210210 |
| 18               | 6                | 0              | 1.633771                | 0.821814  | -3.097671 |
| 19               | 6                | 0              | 4.008264                | 2.089742  | -2.021634 |
| 20               | 6                | 0              | 5.110405                | 1.728985  | -1.221833 |
| 21               | 6                | 0              | 6.422309                | 2.020880  | -1.650138 |
| 22               | 6                | 0              | 6.646336                | 2.671373  | -2.875764 |
| 23               | 6                | 0              | 5.546793                | 3.034462  | -3.680440 |
| 24               | 6                | 0              | 4.239044                | 2.746479  | -3.255556 |
| 25               | 6                | 0              | 1.377512                | 3.363095  | -1.583006 |
| 26               | 6                | 0              | 2.110752                | 4.568723  | -1.615385 |
| 27               | 6                | 0              | 1.446069                | 5.808328  | -1.674645 |
| 28               | 6                | 0              | 0.040178                | 5.861030  | -1.691724 |
| 29               | 6                | 0              | -0.697098               | 4.662220  | -1.636458 |
| 30               | 6                | 0              | -0.035218               | 3.422276  | -1.578693 |
| 31               | 15               | 0              | 0.924510                | -1.634001 | 2.007402  |
| 32               | 15               | 0              | 1.244453                | 1.657031  | 2.083099  |
| 33               | 6                | 0              | -0.717960               | -2.569537 | 2.048557  |
| 34               | 6                | 0              | -1.184794               | -3.100959 | 3.274288  |
| 35               | 6                | 0              | -2.379025               | -3.838524 | 3.324275  |
| 36               | 6                | 0              | -3.120021               | -4.062370 | 2.145777  |
| 37               | 6                | 0              | -2.657941               | -3.540302 | 0.926017  |
| 38               | 6                | 0              | -1.462954               | -2.794700 | 0.876344  |
| 39               | 6                | 0              | 2.092412                | -3.055617 | 2.463016  |
| 40               | 6                | 0              | 1.832570                | -4.359120 | 1.985537  |
| 41               | 6                | 0              | 2.686564                | -5.426451 | 2.318727  |
| 42               | 6                | 0              | 3.811300                | -5.205979 | 3.135945  |
| 43               | 6                | 0              | 4.076454                | -3.908559 | 3.613256  |
| 44               | 6                | 0              | 3.226621                | -2.838887 | 3.274970  |
| 45               | 6                | 0              | 0.806830                | -0.650080 | 3.656678  |
| 46               | 6                | 0              | 1.629634                | 0.647536  | 3.655760  |
| 47               | 6                | 0              | 2.376466                | 3.159908  | 2.243080  |
| 48               | 6                | 0              | 3.695495                | 3.030568  | 2.732518  |

|     |    |   |            |           |           |
|-----|----|---|------------|-----------|-----------|
| 49  | 6  | 0 | 4.525040   | 4.161672  | 2.847048  |
| 50  | 6  | 0 | 4.054043   | 5.432259  | 2.465585  |
| 51  | 6  | 0 | 2.747785   | 5.562345  | 1.958012  |
| 52  | 6  | 0 | 1.915810   | 4.434177  | 1.843806  |
| 53  | 6  | 0 | -0.427419  | 2.380412  | 2.606859  |
| 54  | 6  | 0 | -1.622687  | 1.982728  | 1.977809  |
| 55  | 6  | 0 | -2.865568  | 2.462941  | 2.438137  |
| 56  | 6  | 0 | -2.923581  | 3.347207  | 3.529210  |
| 57  | 6  | 0 | -1.730466  | 3.749455  | 4.164390  |
| 58  | 6  | 0 | -0.491953  | 3.267684  | 3.708235  |
| 59  | 6  | 0 | -0.256892  | 0.108504  | -0.527541 |
| 60  | 6  | 0 | -1.389609  | 0.171995  | -1.057974 |
| 61  | 6  | 0 | -2.734829  | 0.223872  | -1.495149 |
| 62  | 6  | 0 | -3.224951  | 0.568145  | -2.720718 |
| 63  | 6  | 0 | -2.426601  | 0.983204  | -3.929349 |
| 64  | 16 | 0 | -4.019972  | -0.248431 | -0.207884 |
| 65  | 16 | 0 | -5.042713  | 0.543462  | -2.990288 |
| 66  | 6  | 0 | -5.477463  | 0.124264  | -1.255325 |
| 67  | 6  | 0 | -6.748582  | 0.074116  | -0.807332 |
| 68  | 16 | 0 | -7.187670  | -0.363231 | 0.925529  |
| 69  | 16 | 0 | -8.214068  | 0.418644  | -1.866211 |
| 70  | 6  | 0 | -8.997576  | -0.065508 | 0.724509  |
| 71  | 6  | 0 | -9.795667  | -0.256890 | 1.990842  |
| 72  | 6  | 0 | -9.448572  | 0.277955  | -0.502049 |
| 73  | 6  | 0 | -10.868582 | 0.560794  | -0.927074 |
| 74  | 1  | 0 | -0.503527  | -1.523553 | -3.115068 |
| 75  | 1  | 0 | -2.169163  | -3.232680 | -3.743795 |
| 76  | 1  | 0 | -1.846741  | -5.620851 | -3.066033 |
| 77  | 1  | 0 | 0.181827   | -6.265022 | -1.750439 |
| 78  | 1  | 0 | 1.869809   | -4.558139 | -1.143803 |
| 79  | 1  | 0 | 4.220568   | -2.458335 | 0.382642  |
| 80  | 1  | 0 | 6.235523   | -3.888343 | 0.199268  |
| 81  | 1  | 0 | 6.885605   | -4.878842 | -2.006229 |
| 82  | 1  | 0 | 5.462330   | -4.447490 | -4.020282 |
| 83  | 1  | 0 | 3.421501   | -3.066152 | -3.827523 |
| 84  | 1  | 0 | 3.332666   | -0.495169 | -3.412893 |
| 85  | 1  | 0 | 1.802800   | -1.141049 | -4.031186 |
| 86  | 1  | 0 | 0.546298   | 0.767497  | -3.030276 |
| 87  | 1  | 0 | 1.902715   | 1.431156  | -3.967178 |
| 88  | 1  | 0 | 4.949957   | 1.211915  | -0.281483 |
| 89  | 1  | 0 | 7.261747   | 1.731318  | -1.022690 |
| 90  | 1  | 0 | 7.659681   | 2.892699  | -3.203557 |
| 91  | 1  | 0 | 5.706188   | 3.540703  | -4.629790 |
| 92  | 1  | 0 | 3.404554   | 3.050559  | -3.883196 |
| 93  | 1  | 0 | 3.194974   | 4.553038  | -1.584946 |
| 94  | 1  | 0 | 2.028620   | 6.726446  | -1.701593 |
| 95  | 1  | 0 | -0.473264  | 6.818719  | -1.738906 |
| 96  | 1  | 0 | -1.784105  | 4.687280  | -1.629066 |
| 97  | 1  | 0 | -0.619403  | 2.511151  | -1.505715 |
| 98  | 1  | 0 | -0.615505  | -2.957944 | 4.189336  |
| 99  | 1  | 0 | -2.726203  | -4.239230 | 4.273964  |
| 100 | 1  | 0 | -4.046240  | -4.631238 | 2.181912  |
| 101 | 1  | 0 | -3.226311  | -3.691746 | 0.012850  |
| 102 | 1  | 0 | -1.130323  | -2.384294 | -0.068514 |
| 103 | 1  | 0 | 0.955245   | -4.551757 | 1.374774  |
| 104 | 1  | 0 | 2.468909   | -6.424852 | 1.946285  |
| 105 | 1  | 0 | 4.469196   | -6.031689 | 3.397494  |
| 106 | 1  | 0 | 4.945490   | -3.723344 | 4.240339  |
| 107 | 1  | 0 | 3.467928   | -1.840811 | 3.622221  |
| 108 | 1  | 0 | -0.256557  | -0.424318 | 3.794593  |
| 109 | 1  | 0 | 1.123728   | -1.304758 | 4.475922  |
| 110 | 1  | 0 | 2.700442   | 0.436520  | 3.650344  |
| 111 | 1  | 0 | 1.381524   | 1.257488  | 4.532021  |
| 112 | 1  | 0 | 4.088960   | 2.054580  | 2.993441  |
| 113 | 1  | 0 | 5.537847   | 4.045092  | 3.225659  |
| 114 | 1  | 0 | 4.696439   | 6.305301  | 2.556695  |
| 115 | 1  | 0 | 2.373629   | 6.535061  | 1.647987  |
| 116 | 1  | 0 | 0.910231   | 4.555403  | 1.451161  |

|     |   |   |            |           |           |
|-----|---|---|------------|-----------|-----------|
| 117 | 1 | 0 | -1.589626  | 1.303779  | 1.134684  |
| 118 | 1 | 0 | -3.774545  | 2.136386  | 1.940043  |
| 119 | 1 | 0 | -3.882992  | 3.718332  | 3.882812  |
| 120 | 1 | 0 | -1.764222  | 4.432756  | 5.010088  |
| 121 | 1 | 0 | 0.419565   | 3.593973  | 4.203279  |
| 122 | 1 | 0 | -1.359789  | 0.977497  | -3.694687 |
| 123 | 1 | 0 | -2.695662  | 1.996613  | -4.258273 |
| 124 | 1 | 0 | -2.598600  | 0.304854  | -4.777574 |
| 125 | 1 | 0 | -10.864631 | -0.103867 | 1.815522  |
| 126 | 1 | 0 | -9.475839  | 0.449640  | 2.768542  |
| 127 | 1 | 0 | -9.661398  | -1.271569 | 2.389757  |
| 128 | 1 | 0 | -11.180089 | -0.118197 | -1.732457 |
| 129 | 1 | 0 | -10.970028 | 1.588089  | -1.302000 |
| 130 | 1 | 0 | -11.566195 | 0.435742  | -0.093680 |

---

Cartesian Coordinates of  $5^+$   
Radical cation\

Stoichiometry C63H57ClP4RuS4(1+,2)  
Framework group C1[X(C63H57ClP4RuS4)]  
Deg. of freedom 384  
Full point group C1  
Largest Abelian subgroup C1 NOp 1  
Largest concise Abelian subgroup C1 NOp 1  
Standard orientation:

| Center<br>Number | Atomic<br>Number | Atomic<br>Type | Coordinates (Angstroms) |           |           |
|------------------|------------------|----------------|-------------------------|-----------|-----------|
|                  |                  |                | X                       | Y         | Z         |
| 1                | 44               | 0              | -1.548651               | 0.030734  | 0.182633  |
| 2                | 17               | 0              | -3.936616               | 0.205250  | 1.044075  |
| 3                | 15               | 0              | -1.994245               | 1.678944  | -1.692134 |
| 4                | 15               | 0              | -2.232909               | -1.626416 | -1.554475 |
| 5                | 6                | 0              | -0.590341               | 2.842097  | -2.188302 |
| 6                | 6                | 0              | 0.519621                | 2.365306  | -2.918732 |
| 7                | 6                | 0              | 1.558431                | 3.239049  | -3.290354 |
| 8                | 6                | 0              | 1.503639                | 4.598634  | -2.928474 |
| 9                | 6                | 0              | 0.402086                | 5.077573  | -2.194545 |
| 10               | 6                | 0              | -0.638366               | 4.205597  | -1.825310 |
| 11               | 6                | 0              | -3.476092               | 2.842684  | -1.807998 |
| 12               | 6                | 0              | -4.324657               | 3.095990  | -0.714949 |
| 13               | 6                | 0              | -5.415330               | 3.977193  | -0.860984 |
| 14               | 6                | 0              | -5.665613               | 4.605645  | -2.092774 |
| 15               | 6                | 0              | -4.815718               | 4.354291  | -3.189507 |
| 16               | 6                | 0              | -3.725334               | 3.481093  | -3.047491 |
| 17               | 6                | 0              | -2.237674               | 0.633800  | -3.285679 |
| 18               | 6                | 0              | -1.674187               | -0.789674 | -3.168707 |
| 19               | 6                | 0              | -4.045420               | -2.030001 | -1.864542 |
| 20               | 6                | 0              | -4.832481               | -2.497376 | -0.791208 |
| 21               | 6                | 0              | -6.177191               | -2.851970 | -0.997841 |
| 22               | 6                | 0              | -6.755673               | -2.736486 | -2.275635 |
| 23               | 6                | 0              | -5.977501               | -2.266656 | -3.349797 |
| 24               | 6                | 0              | -4.629187               | -1.918972 | -3.146177 |
| 25               | 6                | 0              | -1.396412               | -3.318224 | -1.695742 |
| 26               | 6                | 0              | -2.010158               | -4.359024 | -2.426973 |
| 27               | 6                | 0              | -1.371515               | -5.606045 | -2.562463 |
| 28               | 6                | 0              | -0.115516               | -5.828691 | -1.965922 |
| 29               | 6                | 0              | 0.496301                | -4.796111 | -1.229617 |
| 30               | 6                | 0              | -0.140645               | -3.548094 | -1.094301 |
| 31               | 15               | 0              | -0.944454               | 1.715756  | 1.956352  |
| 32               | 15               | 0              | -1.406560               | -1.571336 | 2.125693  |
| 33               | 6                | 0              | 0.737794                | 2.567893  | 2.022610  |
| 34               | 6                | 0              | 1.221599                | 3.058083  | 3.258506  |
| 35               | 6                | 0              | 2.445489                | 3.745079  | 3.323483  |
| 36               | 6                | 0              | 3.197709                | 3.960732  | 2.151282  |
| 37               | 6                | 0              | 2.718382                | 3.480558  | 0.920310  |
| 38               | 6                | 0              | 1.495264                | 2.783946  | 0.855495  |
| 39               | 6                | 0              | -2.091621               | 3.179808  | 2.290666  |
| 40               | 6                | 0              | -1.733439               | 4.473323  | 1.852467  |
| 41               | 6                | 0              | -2.572386               | 5.571337  | 2.116861  |
| 42               | 6                | 0              | -3.777010               | 5.390436  | 2.821739  |
| 43               | 6                | 0              | -4.139832               | 4.101729  | 3.256906  |
| 44               | 6                | 0              | -3.305763               | 3.000653  | 2.988892  |
| 45               | 6                | 0              | -0.951244               | 0.777812  | 3.631674  |
| 46               | 6                | 0              | -1.836860               | -0.475136 | 3.620123  |
| 47               | 6                | 0              | -2.616677               | -3.005444 | 2.256872  |
| 48               | 6                | 0              | -3.875092               | -2.846468 | 2.877201  |
| 49               | 6                | 0              | -4.767265               | -3.932117 | 2.963120  |
| 50               | 6                | 0              | -4.418204               | -5.183518 | 2.422001  |
| 51               | 6                | 0              | -3.168248               | -5.344007 | 1.793390  |
| 52               | 6                | 0              | -2.272898               | -4.263319 | 1.711705  |

|     |    |   |           |           |           |
|-----|----|---|-----------|-----------|-----------|
| 53  | 6  | 0 | 0.213449  | -2.336624 | 2.735289  |
| 54  | 6  | 0 | 1.457098  | -1.824737 | 2.313336  |
| 55  | 6  | 0 | 2.657023  | -2.331849 | 2.849308  |
| 56  | 6  | 0 | 2.625287  | -3.356071 | 3.812526  |
| 57  | 6  | 0 | 1.385223  | -3.868870 | 4.241950  |
| 58  | 6  | 0 | 0.186743  | -3.361637 | 3.710087  |
| 59  | 6  | 0 | 0.266563  | -0.163954 | -0.446253 |
| 60  | 6  | 0 | 1.432951  | -0.337937 | -0.906967 |
| 61  | 6  | 0 | 2.762468  | -0.507788 | -1.263872 |
| 62  | 6  | 0 | 3.243450  | -1.154639 | -2.398316 |
| 63  | 6  | 0 | 2.393902  | -1.773281 | -3.476928 |
| 64  | 16 | 0 | 4.070536  | 0.171573  | -0.118064 |
| 65  | 16 | 0 | 5.022402  | -1.283092 | -2.628045 |
| 66  | 6  | 0 | 5.493138  | -0.440238 | -1.081484 |
| 67  | 6  | 0 | 6.788929  | -0.284873 | -0.696721 |
| 68  | 16 | 0 | 7.260272  | 0.546429  | 0.854087  |
| 69  | 16 | 0 | 8.208805  | -0.884043 | -1.670833 |
| 70  | 6  | 0 | 9.077446  | 0.314057  | 0.639904  |
| 71  | 6  | 0 | 9.909151  | 0.874598  | 1.766251  |
| 72  | 6  | 0 | 9.497259  | -0.319511 | -0.478878 |
| 73  | 6  | 0 | 10.909862 | -0.636288 | -0.901757 |
| 74  | 1  | 0 | 0.583801  | 1.319440  | -3.204239 |
| 75  | 1  | 0 | 2.402249  | 2.860425  | -3.861885 |
| 76  | 1  | 0 | 2.302197  | 5.275645  | -3.221076 |
| 77  | 1  | 0 | 0.347111  | 6.126933  | -1.916248 |
| 78  | 1  | 0 | -1.492176 | 4.595691  | -1.279208 |
| 79  | 1  | 0 | -4.163239 | 2.595773  | 0.230954  |
| 80  | 1  | 0 | -6.065215 | 4.161797  | -0.009894 |
| 81  | 1  | 0 | -6.510357 | 5.281377  | -2.201684 |
| 82  | 1  | 0 | -4.998193 | 4.837851  | -4.145864 |
| 83  | 1  | 0 | -3.068264 | 3.316050  | -3.898208 |
| 84  | 1  | 0 | -3.317639 | 0.610424  | -3.460504 |
| 85  | 1  | 0 | -1.774341 | 1.169014  | -4.121504 |
| 86  | 1  | 0 | -0.581391 | -0.782193 | -3.128385 |
| 87  | 1  | 0 | -1.966481 | -1.402569 | -4.028907 |
| 88  | 1  | 0 | -4.413559 | -2.568328 | 0.204577  |
| 89  | 1  | 0 | -6.769910 | -3.206611 | -0.158953 |
| 90  | 1  | 0 | -7.797486 | -3.004719 | -2.432126 |
| 91  | 1  | 0 | -6.413089 | -2.172600 | -4.341335 |
| 92  | 1  | 0 | -4.054538 | -1.571959 | -3.999812 |
| 93  | 1  | 0 | -2.987728 | -4.212245 | -2.876559 |
| 94  | 1  | 0 | -1.856323 | -6.398953 | -3.126403 |
| 95  | 1  | 0 | 0.374692  | -6.793770 | -2.067663 |
| 96  | 1  | 0 | 1.460524  | -4.960526 | -0.754652 |
| 97  | 1  | 0 | 0.339720  | -2.764927 | -0.519083 |
| 98  | 1  | 0 | 0.645803  | 2.926389  | 4.170584  |
| 99  | 1  | 0 | 2.803712  | 4.117526  | 4.279871  |
| 100 | 1  | 0 | 4.141219  | 4.498655  | 2.199641  |
| 101 | 1  | 0 | 3.288000  | 3.640675  | 0.009226  |
| 102 | 1  | 0 | 1.142318  | 2.421149  | -0.101905 |
| 103 | 1  | 0 | -0.794200 | 4.636579  | 1.331903  |
| 104 | 1  | 0 | -2.280703 | 6.563453  | 1.781338  |
| 105 | 1  | 0 | -4.420834 | 6.240734  | 3.031875  |
| 106 | 1  | 0 | -5.068639 | 3.949544  | 3.800845  |
| 107 | 1  | 0 | -3.618970 | 2.012593  | 3.307418  |
| 108 | 1  | 0 | 0.090312  | 0.507051  | 3.836391  |
| 109 | 1  | 0 | -1.282647 | 1.469453  | 4.413354  |
| 110 | 1  | 0 | -2.891781 | -0.209113 | 3.533368  |
| 111 | 1  | 0 | -1.683978 | -1.062406 | 4.532931  |
| 112 | 1  | 0 | -4.179133 | -1.886723 | 3.278297  |
| 113 | 1  | 0 | -5.729727 | -3.795602 | 3.449420  |
| 114 | 1  | 0 | -5.108139 | -6.020805 | 2.489532  |
| 115 | 1  | 0 | -2.888477 | -6.304321 | 1.368485  |
| 116 | 1  | 0 | -1.309996 | -4.412104 | 1.233315  |
| 117 | 1  | 0 | 1.499063  | -1.035823 | 1.571749  |
| 118 | 1  | 0 | 3.605988  | -1.922594 | 2.512963  |
| 119 | 1  | 0 | 3.550993  | -3.748685 | 4.225870  |
| 120 | 1  | 0 | 1.349678  | -4.657886 | 4.988928  |

|     |   |   |           |           |           |
|-----|---|---|-----------|-----------|-----------|
| 121 | 1 | 0 | -0.759147 | -3.771448 | 4.052750  |
| 122 | 1 | 0 | 1.366084  | -1.882536 | -3.125078 |
| 123 | 1 | 0 | 2.762871  | -2.767436 | -3.756696 |
| 124 | 1 | 0 | 2.391853  | -1.153336 | -4.384727 |
| 125 | 1 | 0 | 10.975455 | 0.714362  | 1.586225  |
| 126 | 1 | 0 | 9.654447  | 0.396934  | 2.721193  |
| 127 | 1 | 0 | 9.746620  | 1.954495  | 1.877860  |
| 128 | 1 | 0 | 11.149729 | -0.163538 | -1.862919 |
| 129 | 1 | 0 | 11.055012 | -1.718328 | -1.015430 |
| 130 | 1 | 0 | 11.631995 | -0.277788 | -0.163413 |

-----
